# Supplementary material
Source: ML conference proceedings conference paper supplement (https://openreview.net/forum?id=kocBczDfBeT)
Supplement: supplementary_material [file attachment]

# MARICH: A QUERY-EFFICIENT & ONLINE MODEL EXTRACTION ATTACK USING PUBLIC DATA

**Anonymous authors**

Paper under double-blind review

## ABSTRACT

In this paper, we study black-box model stealing attacks where the attacker is only able to query a machine learning model only through publicly available APIs. Specifically our aim is to design a black-box model stealing attack that uses a minimal number of queries to create an informative replica of the target model. First, we reduce this problem into an online variational optimisation problem. The attacker solves this problem to select the most informative queries that maximise the entropy of the selected queries and simultaneously reduce the mismatch between the target and the stolen models. We propose an online and adaptive algorithm, MARICH that leverages active learning to select the queries. We instantiate efficiency of our attack on different text and image data sets and different models including BERT and ResNet18. Marich is able to steal a model that can achieve 69-96% of true model’s accuracy using 0.83-6.15% samples from the attack datasets which are completely different from the training data sets. Our stolen models also achieve 85-95% accuracy of membership inference and also show 77-94% agreement of membership inference with direct membership inference on the target models. Our experiments validate that Marich is query efficient and also capable of creating an informative replica of the target model.

## 1 INTRODUCTION

In recent years, Machine Learning as a Service (MLaaS) are widely deployed and used in industries. In MLaaS (Ribeiro et al., 2015), an ML model is trained remotely on a private dataset, deployed in a Cloud, and offered for public access through a prediction API, such as Amazon AWS, Google API, Microsoft Azure. This API allows an user, including a potential adversary, to send queries to the ML model and fetch corresponding predictions. Recent works have shown such models with public APIs can be stolen or extracted by designing black-box model extraction attacks (Tramèr et al., 2016). In model extraction attacks, an adversary queries the target model with a query dataset, which might be same or different than the private dataset, collects the corresponding predictions from the target model, and builds a replica model of the target model. The goal is to construct a model which is nearly-equivalent to the target model over the input space of interest (Jagielski et al., 2020).

Often, ML models are proprietary, guarded by IP rights, and expensive to build. These models might be trained on datasets which are expensive to obtain (Yang et al., 2019) and consist of private data of individuals (Lowd & Meek, 2005). Also, extracted models can be used to perform other privacy attacks on the private dataset used for training, such as membership inference (Nasr et al., 2019). Thus, understanding susceptibility of models accessible through MLaaS presents an important conundrum. This motivates us to investigate black-box model extraction attacks while the adversary has no access to the private data or a perturbed version of it (Papernot et al., 2017). Instead, the adversary uses a public dataset to query the target model (Orekondy et al., 2019; Pal et al., 2020).

Black-box model extraction attacks pose a tension between the number of queries sent to the target ML model and the accuracy of extracted model (Pal et al., 2020). With more number of queries and predictions, adversary can build a better replica. But querying an API too much can be expensive, as each query incurs a monetary cost in MLaaS. Also, researchers have developed algorithms that can detect adversarial queries, when they are not well-crafted or sent to the API in large numbers (Juuti et al., 2019; Pal et al., 2021). Thus, designing a query-efficient attack is paramount for practical deployment. Also, it indicates how more information can be leaked from a target model with less number of interactions.

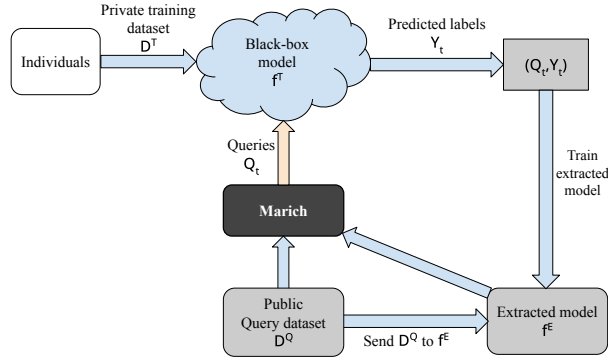

Figure 1: A schematic for black-box model extraction attack with MARICH.

In this paper, we investigate effective definitions of efficiency of model extraction and corresponding algorithm design for query-efficient black-box model extraction attack with public data, which is oblivious to deployed model and applicable for any datatype.

**Our contributions.** Our investigation yields three-fold contributions.

1. *Formalism: Distribution Equivalence and Max-Information Extraction.* Often, the ML models, specifically classifiers, are stochastic algorithms. They also include different elements of randomness during training. Thus, rather than focusing on equivalence of extracted and target models in terms of a fixed dataset or accuracy on that dataset (Jagielski et al., 2020), we propose a distributional notion of equivalence. We propose that if the joint distributions induced by a query generating distributions and corresponding prediction distributions due to the target and extracted models are same, they will be called distributionally equivalent (Sec. 4). Another proposal is to reinforce the objective of the attack, i.e. to extract as much information as possible from the target model. This allows us to formulate the Max-Information attack, where the adversary aims to maximise the mutual information between the extracted and target models’ distributions. We further show that both of these attacks can be performed by optimising a variational objective (Staines & Barber, 2012).

2. *Algorithm: Adaptive Query Selection for Extraction with MARICH.* We propose an algorithm, MARICH (Sec. 5), that optimises the objective of the variational optimisation problem (Equation 6). Given an extracted model, a target model, and previous queries, MARICH adaptively selects a batch of queries enforcing this objective. Then, it sends the queries to the target model, collect the predictions, and use them to further train the extracted model (Algorithm 1). In order to select the most informative set of queries, it deploys three sampling strategies sequentially. These three strategies select: a) the most informative set of queries, b) the most diverse set of queries in the first selection, and c) the set of queries in the first selection where the target and extracted models mismatch the most. Together these strategies allow MARICH to select a small subset of queries, which maximise the information leakage and align the extracted model with the target (Figure 1).

3. *Experimental Analysis.* We perform extensive experimental evaluation with both image and text datasets, and diverse model classes, such as logistic regression, ResNet18, and BERT (Sec. 6). Our experimental results validate that MARICH can extract accurate and informative replicas of the target models in comparison to random sampling. While MARICH uses a small number of queries (0.83 – 6.15%) selected from publicly available query datasets, the models extracted by it lead to comparable accuracy with the target model while encountering a membership inference attack. This shows that MARICH can extract alarmingly informative models query-efficiently.

## 2 RELATED WORKS

Here, we elaborate the questions in the model extraction literature that we aim to mitigate.

**Taxonomy of Model Extraction.** Black-box model extraction (or model stealing or model inference) attacks aim to *replicate* of a target ML model, commonly classifiers, deployed in a remote service and accessible through a public API (Tramèr et al., 2016). The replication is done in such a way that the extracted model achieves one of the three goals: a) accuracy close to that of the target model on the private training data used to train the target model, b) maximal agreement in predic-

tions with the target model on the private training data, and c) maximal agreement in prediction with the target model over the whole input domain. Depending on the objective, they are called *task accuracy*, *fidelity*, and *functional equivalence model extractions*, respectively (Jagielski et al., 2020). Here, we generalise these three approaches using a novel definition of *distributional equivalence* and also introduce a novel information-theoretic objective of model extraction which maximises the mutual information between the target and the extracted model over the whole data domain.

**Framework of Attack Design.** Following Tramèr et al. (2016), researchers have proposed multiple attack algorithms to perform one of the three types of model extraction. The attack algorithms are based on two main approaches: direct recovery (target model specific) (Milli et al., 2019; Batina et al., 2018; Jagielski et al., 2020) and learning (target model specific/oblivious). The learning-based approaches can also be categorised into supervised learning strategies, where the adversary has access to both the true labels of queries and the labels predicted by the target model (Tramèr et al., 2016; Jagielski et al., 2020), and online active learning strategies, where the adversary has only access to the predicted labels of the target model, and actively select the future queries depending on the previous queries and predicted labels (Papernot et al., 2017; Pal et al., 2020; Chandrasekaran et al., 2020). As *query-efficiency is paramount for an adversary while attacking an API to save the budget and to keep the attack hidden and also the assumption of access true label from the private data is restrictive*, we focus on designing an online and active learning-based attack strategy which can be model oblivious.

**Classes of Target Model.** While (Milli et al., 2019; Chandrasekaran et al., 2020) focus on performing attacks against linear models, all others are specific to neural networks (Milli et al., 2019; Jagielski et al., 2020; Pal et al., 2020) and even a specific architecture (Correia-Silva et al., 2018). In contrast, MARICH is based on active learning methodology and also capable to attack both linear models and neural networks.

**Types of Query Feedback.** Learning-based attack algorithms often assume access to either the probability vector of the target model over all the predicted labels (Tramèr et al., 2016; Orekondy et al., 2019; Pal et al., 2020; Jagielski et al., 2020), or the gradient of the last layer of the target neural network (Milli et al., 2019; Miura et al., 2021), which are hardly available in a public API. In contrast, following (Papernot et al., 2017), we assume access to only the predicted labels of the target model for a given set of queries, which is always available through a public API.

**Type of Query Dataset.** The adversary needs a query dataset to select the queries from and to send it to the target model to obtain predicted labels. In literature, researchers assume three types of query datasets: synthetically generated samples (Tramèr et al., 2016), adversarially perturbed private (or problem domain) dataset (Papernot et al., 2017; Juuti et al., 2019), and publicly available (or out-of-problem domain) dataset (Orekondy et al., 2019; Pal et al., 2020). As we do not want to restrict MARICH to have access to the knowledge of the private dataset or any perturbed version of it, we use publicly available datasets, which are different than the private dataset.

In brief, we propose an online and active-learning based model extraction attack using MARICH, which is model-oblivious, assumes only access to the predicted label for a given query through a public API, and uses only publicly available non-domain data to query the target model. This is a less restrictive setup than the ones considered in literature, while the models extracted by MARICH demonstrate significant accuracy and act as informative replica of the target model to conduct pervasive membership inference on the private dataset.

### 3 BACKGROUND: CLASSIFIERS, MODEL EXTRACTION, AND MEMBERSHIP INFERENCE ATTACKS

Before proceeding to the details of our contribution, we present the fundamentals of a classifier in ML, and two types of inference attacks: Model Extraction (ME) and Membership Inference (MI).

**Classifiers.** A classifier in ML (Goodfellow et al., 2016) is a function  $f : \mathcal{X} \rightarrow \mathcal{Y}$  that maps a set of input features  $\mathbf{X} \in \mathcal{X}$  to an output  $Y \in \mathcal{Y}$ .<sup>1</sup> The output space is a finite set of classes, i.e.  $\{1, \dots, k\}$ . Specifically, a classifier  $f$  is a parametric function, denoted as  $f_\theta$ , with parameters  $\theta \in \mathbb{R}^d$ , and is trained on a dataset  $\mathbf{D}^T$ , i.e. a collection of  $n$  tuples  $\{(\mathbf{x}_i, y_i)\}_{i=1}^n$  generated IID

<sup>1</sup>We represent sets/vectors by bold letters, and the corresponding distributions by calligraphic letters. We express random variables in uppercase, and an assignment of a random variable in lowercase.

from an underlying distribution  $\mathcal{D}$ . Training implies that given a model class  $\mathcal{F} = \{f_\theta | \theta \in \Theta\}$ , a loss function  $l : \mathcal{Y} \times \mathcal{Y} \rightarrow \mathbb{R}_{\geq 0}$ , and training dataset  $\mathbf{D}^T$ , we aim to find the optimal parameter  $\theta^* \triangleq \arg \min_{\theta \in \Theta} \sum_{i=1}^n l(f_\theta(\mathbf{x}_i), y_i)$ . We use cross-entropy, i.e.  $l(f_\theta(\mathbf{x}_i), y_i) \triangleq -y_i \log(f_\theta(\mathbf{x}_i))$ , as the loss function for classification.

**Model Extraction Attack.** A model extraction attack is an inference attack where an adversary aims to steal a target model  $f^T$  trained on a private dataset  $\mathbf{D}^T$  and create another replica of it  $f^E$  (Tramèr et al., 2016). In the black-box setting that we are interested in, the adversary can only query the target model  $f^T$  by sending queries  $Q$  through a publicly available API and to use the corresponding predictions  $\hat{Y}$  to construct  $f^E$ . The goal of the adversary is to create a model which is either (a) as similar to the target model as possible for all input features, i.e.  $f^T(x) = f^E(x) \forall x \in \mathcal{X}$  (Song & Shmatikov, 2020; Chandrasekaran et al., 2020) or (b) predicts labels that has maximal agreement with that of the labels predicted by the target model for a given data-generating distribution, i.e.  $f^E = \arg \min \Pr_{x \sim \mathcal{D}}[l(f^E(x), f^T(x))]$  (Tramèr et al., 2016; Pal et al., 2020; Jagielski et al., 2020). The first type of attacks are called the functionally equivalent attacks. The later family of attacks is referred as the fidelity extraction attacks. The third type of attacks aim to find an extracted model  $f^E$  that achieves maximal classification accuracy for the underlying private dataset used to train the  $f^T$ . These are called task accuracy extraction attacks (Tramèr et al., 2016; Milli et al., 2019; Orekondy et al., 2019). In this paper, we generalise the first two type of attacks by proposing the distributionally equivalent attacks and experimentally show that it achieves significant task accuracy.

**Membership Inference Attack.** Another popular family of inference attacks on ML models is the Membership Inference (MI) attacks (Shokri et al., 2017; Yeom et al., 2018). In MI attacks, given a private (or member) dataset  $\mathbf{D}^T$  to train  $f^T$  and another non-member dataset  $S$  with  $|\mathbf{D}^T \cap S| \neq \emptyset$ , the goal of the adversary is to infer whether any  $x \in \mathcal{X}$  is sampled from the member dataset  $\mathbf{D}^T$  or the non-member dataset  $S$ . Effectiveness of an MI attacks can be measured by its accuracy of MI, i.e. the total fraction of times the MI adversary identifies the member and non-member data points correctly. Accuracy of MI attack on the private data using  $f^E$  rather than  $f^T$  is considered as a measure of effectiveness of the extraction attack (Nasr et al., 2019). We show that the model  $f^E$  extracted using MARICH allows us to obtain similar MI accuracy as that obtained by directly attacking the target model  $f^T$  using even larger number of queries. This validates that *the model  $f^E$  by MARICH in a black-box setting acts as an information equivalent replica of the target model  $f^T$ .*

## 4 DISTRIBUTIONAL EQUIVALENCE & MAX-INFORMATION MODEL EXTRACTIONS: A VARIATIONAL OPTIMISATION FORMULATION

In this section, we introduce the notions of distributionally equivalent and max-information model extractions. We further reduce both the attacks into a single variational optimisation problem.

**Definition 1** (Distributionally Equivalent Model Extraction). *For any query generating distribution  $\mathcal{D}^Q$  over  $\mathbb{R}^d \times \mathcal{Y}$ , an extracted model  $f^E : \mathbb{R}^d \rightarrow \mathcal{Y}$  is distributionally equivalent to a target model  $f^T : \mathbb{R}^d \rightarrow \mathcal{Y}$  if the joint distributions of input features  $Q \in \mathbb{R}^d \sim \mathcal{D}^Q$  and predicted labels induced by both the models are same almost surely. This means that for any divergence  $D$ , two distributionally equivalent models  $f^E$  and  $f^T$  satisfy  $D(\Pr(f^T(Q), Q) \| \Pr(f^E(Q), Q)) = 0 \forall \mathcal{D}^Q$ .*

To ensure query-efficiency in distributionally equivalent model extraction, an adversary aims to choose a query generating distribution  $\mathcal{D}^Q$  that minimises it further. If we assume that the extracted model is also a parametric function, i.e.  $f_\omega^E$  with parameters  $\omega \in \Omega$ , we can solve the query-efficient distributionally equivalent extraction by computing

$$(\omega_{\text{DEq}}^*, \mathcal{D}_{\min}^Q) \triangleq \arg \min_{\omega \in \Omega} \arg \min_{\mathcal{D}^Q} D(\Pr(f_{\theta^*}^T(Q), Q) \| \Pr(f_\omega^E(Q), Q)). \quad (1)$$

Equation 1 allows us to choose a different class of models with different parametrisation for extraction till the joint distribution induced by it matches with that of the target model. For example, the extracted model can be a logistic regression or a CNN if the target model is a logistic regression. This formulation also enjoys the freedom to choose the data distribution  $\mathcal{D}^Q$  for which we want to test the closeness. Rather the distributional equivalence pushes us to find the best query distribution for which the mismatch between the posteriors reduces the most and to compute an extracted model  $f_{\omega^*}^E$  that induces the joint distribution closest to that of the target model  $f_{\theta^*}^T$ .

**Remark 1.** If we choose  $\mathcal{D}_{\min}^Q = \mathcal{D}^T$ , distributional equivalence reduces to the fidelity extraction attack. If we choose  $\mathcal{D}_{\min}^Q = \text{Unif}(\mathcal{X})$ , distributional equivalent extraction coincides with functional equivalent extraction. Thus, distributional equivalence attack can ensure both fidelity and functional equivalence extractions depending on the choice of query generating distribution  $\mathcal{D}^Q$ .

**Theorem 1** (Upper Bounding Distributional Closeness). *If we choose KL-divergence as the divergence function  $D$ , then for a given query generating distribution  $\mathcal{D}^Q$*

$$D_{\text{KL}}(\Pr(f_{\theta^*}^T(Q), Q) \| \Pr(f_{\omega_{\text{DEq}}}^E(Q), Q)) \leq \min_{\omega} \mathbb{E}_Q[l(f_{\theta^*}^T(Q), f_{\omega}^E(Q))] - H(f_{\omega}^E(Q)). \quad (2)$$

By variational principle, Theorem 1 implies that *minimising the upper bound* on the RHS will lead to an extracted model which minimises the KL-divergence for a chosen query distribution.

**Max-Information Model Extraction.** The common objective of any inference attack is to leak as much information as possible from the target model  $f^T$ . Specifically, in model extraction attacks, we want to create an informative replica  $f^E$  of the target model  $f^T$  such that it induces a joint distribution  $\Pr(f_{\omega}^E(Q), Q)$  which retains the most information regarding the target’s joint distribution. As adversary can control the query distribution, we want to choose such a query distribution  $\mathcal{D}^Q$  for which the information leakage is maximised.

**Definition 2** (Max-Information Model Extraction). *A model  $f^E : \mathbb{R}^d \rightarrow Y$  and query distribution  $\mathcal{D}^Q$  are called a max-information extraction of a target model  $f^T : \mathbb{R}^d \rightarrow Y$  and max-information query distribution, respectively, if they maximise the mutual information between the joint distributions of input features  $Q \in \mathbb{R}^d \sim \mathcal{D}^Q$  and predicted labels induced by  $f^E$  and that of the target model. Mathematically,  $(f_{\omega^*}^E, \mathcal{D}_{\max}^Q)$  is a max-information extraction of  $f_{\theta^*}^T$  such that*

$$(\omega_{\text{MaxInf}}^*, \mathcal{D}_{\max}^Q) \triangleq \max_{\omega} \arg \max_{\mathcal{D}^Q} I(\Pr(f_{\theta^*}^T(Q), Q) \| \Pr(f_{\omega}^E(Q), Q)) \quad (3)$$

Similar to Definition 1, Definition 2 also does not restrict us to choose a parametric model  $\omega$  different than that of the target  $\theta$ . It also allows us to compute the data distribution  $\mathcal{D}^Q$  for which the information leakage is maximum rather than relying on the private dataset  $\mathbf{D}^T$  used for training  $f^T$ .

**Theorem 2** (Lower Bounding Information Leakage). *For any given distribution  $\mathcal{D}^Q$ , the information leaked by any max-information attack (Equation 3) is lower bounded as follows:*

$$I(\Pr(f_{\theta^*}^T(Q), Q) \| \Pr(f_{\omega_{\text{MaxInf}}^*}^E(Q), Q)) \geq \max_{\omega} -\mathbb{E}_Q[l(f_{\theta^*}^T(Q), f_{\omega}^E(Q))] + H(f_{\omega}^E(Q)). \quad (4)$$

By variational principle, Theorem 2 implies that *maximising the lower bound* in the RHS will lead to an extracted model which maximises the mutual information between target and extracted joint distributions for a given query generating distribution.

**Distributionally Equivalent and Max-Information Extractions: A Variational Optimisation Formulation.** From Theorem 1 and 2, we observe that the lower and upper bounds of the objective functions of distribution equivalent and max-information attacks are negatives of each other. Specifically,  $-D_{\text{KL}}(\Pr(f_{\theta^*}^T(Q), Q) \| \Pr(f_{\omega_{\text{DEq}}}^E(Q), Q)) \geq \max_{\omega} -F(\omega, \mathcal{D}^Q)$  and  $I(\Pr(f_{\theta^*}^T(Q), Q) \| \Pr(f_{\omega_{\text{MaxInf}}^*}^E(Q), Q)) \geq \max_{\omega} F(\omega, \mathcal{D}^Q)$ , where

$$F(\omega, \mathcal{D}^Q) \triangleq -\mathbb{E}_Q[l(f_{\theta^*}^T(Q), f_{\omega}^E(Q))] + H(f_{\omega}^E(Q)). \quad (5)$$

Thus, following a variational approach, we aim to solve an optimisation problem on  $F(\omega, \mathcal{D}^Q)$  in an online and frequentist manner. Specifically, we do not assume a parametric family of  $\mathcal{D}^Q$ . Instead, we choose a set of queries  $Q_t \in \mathbb{R}^d$  at each round  $t \in T$ . This leads to an empirical counterpart of our problem, i.e.

$$\max_{\omega \in \omega} \max_{Q_{[0, T]} \in \mathbf{D}^Q_{[T]}} \hat{F}(\omega, Q_{[0, T]}) \triangleq \max_{\omega \in \omega} \max_{Q_{[0, T]} \in \mathbf{D}^Q_{[T]}} -\frac{1}{T} \sum_{t=1}^T l(f_{\theta^*}^T(Q_t), f_{\omega}^E(Q_t)) + \sum_{t=1}^T H(f_{\omega}^E(Q_t)). \quad (6)$$

As we need to evaluate  $f_{\theta^*}^T$  for each  $Q_t$ , we refer  $Q_t$ ’s as queries, the dataset  $\mathbf{D}^Q \subseteq \mathbb{R}^d \times \mathcal{Y}$  from where they are chosen as the query dataset, and the corresponding unobserved distribution  $\mathcal{D}^Q$  as the query generating distribution. Given the optimisation problem of Equation 6, we propose an algorithm MARICH to solve it effectively.

## 5 MARICH: A QUERY SELECTION ALGORITHM FOR MODEL EXTRACTION

In this section, we propose an algorithm, MARICH, to solve Equation 6 in a query-efficient manner.

**Algorithm Design.** In Equation 6, we observe that once the queries  $Q_{[0,T]}$  are selected the outer maximisation problem, equivalent to regularised loss minimisation, can be solved using any standard empirical risk minimisation algorithm, such as Adam, SGD etc. Thus, to achieve query efficiency, we focus on designing a query selection algorithm that selects a batch of queries  $Q_t$  at round  $t \leq T$  such that

$$Q_t \triangleq \arg \max_{Q \in \mathbf{D}^Q} -\frac{1}{t} \sum_{i=1}^{t-1} l(f_{\theta^*}^T(Q_i \cup Q), f_{\omega_{t-1}}^E(Q_i \cup Q)) + \sum_{i=1}^{t-1} H(f_{\omega_{t-1}}^E(Q_i \cup Q)). \quad (7)$$

Here,  $f_{\omega_{t-1}}^E$  is the model extracted by round  $t-1$ . The objective of query selection using Equation 7 is two-fold. First, we want to select a query that maximises the entropy of predictions for the extracted model  $f_{\omega_{t-1}}^E$ . This allows us to select the queries which are most informative about the mapping between the input features and the prediction space. Secondly, Equation 7 also pushes the adversary to select queries where the target and extracted models mismatch the most. Thus, minimising the loss between target and extracted models for such a query forces them to match over the whole domain of queries. In MARICH, we execute this query selection in two phases.

*Initialisation Phase.* In the Phase 1, i.e. the initialisation phase, we select a set of  $n_0$  queries, called  $Q_0^{train}$  uniformly randomly from the query dataset  $\mathbf{D}^Q$ . We send these queries to the target model and collect corresponding predicted classes  $Y_0^{train}$  (Line 3). We use these  $n_0$  samples of input-predicted label pairs to construct a primary extracted model  $f_0^E$ .

*Adaptive Phase.* In Phase 2, i.e. the adaptive phase, we select  $\gamma_1 \gamma_2 B$  number of queries at every round  $t$ . In order to be query-efficient, we sequentially deploy three query selection mechanisms, namely ENTROPYSAMPLING, GRADIENTSAMPLING, and LOSSAMPLING. These techniques together aim to select a batch of  $Q_t$  at every step that optimises the objective of Equation 7.

**ENTROPYSAMPLING.** First, we aim to select the set of queries which unveil most information about the mapping between the input features and the prediction space. Thus, we deploy ENTROPYSAMPLING. In ENTROPYSAMPLING, we compute the output probability vectors from  $f_{t-1}^E$  for all the query points in  $\mathbf{D}^Q \setminus Q_{t-1}^{train}$  and then select top  $B$  points with highest entropy (Line 18). This selects the queries  $Q_t^{entropy}$ , about which  $f_{t-1}^E$  is most confused and training on these essentially would make the model a better classifier.

**GRADIENTSAMPLING.** To be frugal about the number of queries, we refine  $Q_t^{entropy}$  to compute the most diverse subset of it. First, we compute the gradients of entropy of  $f_{t-1}^E(x)$ , i.e.  $\nabla_x H(f_{t-1}^E(x))$ , for all  $x \in Q_t^{entropy}$ . The gradient at point  $x$  reflects the change at  $x$  in the prediction distribution induced by  $f_{t-1}^E$ . We use these gradients to embed the points  $x \in Q_t^{entropy}$ . Now, we deploy K-means clustering to find  $k$  ( $= \#classes$ ) clusters and sample  $\gamma_1 B$  points (Line 25), namely  $Q_t^{grad}$ , from these clusters. Selecting points from  $k$  different clusters ensures diversity of queries and reduces the number of queries by  $\gamma_1$ .

**LOSSAMPLING.** In this step, we select points from  $Q_t^{grad}$  for which the predictions of  $f_{\theta^*}^T$  and  $f_{t-1}^E$  are most dissimilar. To identify these points, we compute the loss  $l(f^T(x), f_{t-1}^E(x))$  for all  $x \in Q_{t-1}^{train}$ . Then, we select top- $k$  points from  $Q_{t-1}^{train}$  with the highest loss values (Line 29), and sample a subset  $Q_t^{loss}$  of size  $\gamma_1 \gamma_2 B$  from  $Q_t^{grad}$  which are closest to the  $k$  points selected from  $Q_{t-1}^{train}$  (Line 31). This ensures that  $f_{t-1}^E$  would align with  $f^T$  better if it trains on the points at which the mismatch in their predictions is the highest.

At the end of Phase 2 in each round of sampling,  $Q_t^{loss}$  is sent to  $f^T$  for fetching the labels  $Y_t^{train}$  predicted by the target model. We use  $(Q_t^{loss}, Y_t^{loss})$  along with  $(Q_{t-1}^{train}, Y_{t-1}^{train})$  to train  $f_{t-1}^E$  further. Thus, MARICH performs  $n_0 + \gamma_1 \gamma_2 BT$  number of queries through  $T+1$  number of interactions with the target model  $f^T$  to create the final extracted model  $f_T^E$ . We describe a pseudocode for MARICH in Algorithm 1. We experimentally demonstrate effectiveness of the model extracted by MARICH to achieve high task accuracy and to act as an informative replica of the target model for extracting private information regarding the private training data  $\mathbf{D}^T$ .

**Algorithm 1** MARICH

---

**Input:** Target model:  $f^T$ , Query dataset:  $\mathbf{D}^Q$ , #Classes:  $k$   
**Parameter:** #initial samples:  $n_0$ , Training epochs:  $E_{max}$ , #Batches of queries:  $T$ , Query budget:  $B$ , Subsampling ratios:  $\gamma_1, \gamma_2 \in (0, 1]$   
**Output:** Extracted model  $f^E$

---

```

1: /* Initialisation of the extracted model */                                ▷ Phase 1
2:  $Q_0^{train} \leftarrow n_0$  datapoints randomly chosen from  $\mathbf{D}^Q$ 
3:  $Y_0^{train} \leftarrow f^T(Q_0^{train})$                                 ▷ Query the target model  $f^T$  with  $Q_0^{train}$ 
4: for epoch  $\leftarrow 1$  to  $E_{max}$  do
5:    $f_0^E \leftarrow \text{Train } f^E \text{ with } (Q_0^{train}, Y_0^{train})$ 
6: /* Adaptive query selection to build the extracted model */                                ▷ Phase 2
7: for  $t \leftarrow 1$  to  $T$  do
8:    $Q_t^{entropy} \leftarrow \text{ENTROPYSAMPLING}(f_{t-1}^E, \mathbf{D}^Q \setminus Q_{t-1}^{train}, B)$ 
9:    $Q_t^{grad} \leftarrow \text{GRADIENTSAMPLING}(f_{t-1}^E, Q_t^{entropy}, \gamma_1 B)$ 
10:   $Q_t^{loss} \leftarrow \text{LOSSSAMPLING}(f_{t-1}^E, Q_t^{grad}, Q_{t-1}^{train}, Y_{t-1}^{train}, \gamma_1 \gamma_2 B)$ 
11:   $Y_t^{new} \leftarrow f^T(Q_t^{loss})$                                 ▷ Query the target model  $f^T$  with  $Q_t^{loss}$ 
12:   $Q_t^{train} \leftarrow Q_{t-1}^{train} \cup Q_t^{loss}$ 
13:   $Y_t^{train} \leftarrow Y_{t-1}^{train} \cup Y_t^{new}$ 
14:  for epoch  $\leftarrow 1$  to  $E_{max}$  do
15:     $f_t^E \leftarrow \text{Train } f_{t-1}^E \text{ with } (Q_t^{train}, Y_t^{train})$ 
16: return Extracted model  $f^E \leftarrow f_T^E$ 

17: function ENTROPYSAMPLING(extracted model:  $f^E$ , input data points:  $X_{in}$ , budget:  $B$ )
18:    $Q_{entropy} \leftarrow \arg \max_{X \subset X_{in}, |X|=B} H(f^E(X_{in}))$  ▷ Select  $B$  points with maximum entropy
19:   return  $Q_{entropy}$ 

20: function GRADIENTSAMPLING(extracted model:  $f^E$ , input data points:  $X_{in}$ , budget:  $\gamma_1 B$ )
21:    $E \leftarrow H(f^E(X_{in}))$ 
22:    $G \leftarrow \{\nabla_x E \mid x \in X_{in}\}$ 
23:    $C_{in} \leftarrow k$  centres of  $G$  computed using K-means
24:    $Q_{grad} \leftarrow \arg \min_{X \subset X_{in}, |X|=\gamma_1 B} \sum_{x_i \in X} \sum_{x_j \in C_{in}} \|\nabla_{x_i} E - \nabla_{x_j} E\|_2^2$ 
25:   ▷ Select  $\gamma_1 B$  points from  $X_{in}$  whose  $\frac{\partial E}{\partial x}$  are closest to that of  $C_{in}$ 
26:   return  $Q_{grad}$ 

27: function LOSSSAMPLING(extracted model:  $f^E$ , input data points:  $X_{in}$ , previous queries:  $Q_{train}$ , previous predictions:  $Y_{train}$ , budget:  $\gamma_1 \gamma_2 B$ )
28:    $L \leftarrow l(Y_{train}, f^E(Q_{train}))$                                 ▷ Compute the mismatch vector
29:    $Q_{mis} \leftarrow \text{ARGMAXSORT}(L, k)$                                 ▷ Select top-k mismatching points
30:    $Q_{loss} \leftarrow \arg \min_{X \subset X_{in}, |X|=\gamma_1 \gamma_2 B} \sum_{x_i \in X} \sum_{x_j \in Q_{mis}} \|x_i - x_j\|_2^2$ 
31:   ▷ Select  $\gamma_1 \gamma_2 B$  points closest to  $Q_{mis}$ 
32:   return  $Q_{loss}$ 

```

---

## 6 EXPERIMENTAL ANALYSIS

In this section, we perform an experimental evaluation of models extracted by MARICH. In the following, we discuss the experimental setup, the objectives of experiments, and experimental results. We defer the source code and additional experimental results to the supplementary material.

**Experimental Setup.** We have implemented a prototype of MARICH using Python 3.9 and PyTorch 1.12, and run on a NVIDIA Quadro GV100 32 GB GPU. We perform our attacks against three target models ( $f^T$ ), namely Logistic Regression (LR), ResNet18 (He et al., 2016), and BERT (Devlin et al., 2018), trained on three private datasets ( $\mathbf{D}^T$ ): MNIST handwritten digits (Deng, 2012), CIFAR10 (Krizhevsky et al.) and BBC News, respectively. For model extraction, we use EMNIST letters dataset (Cohen et al., 2017), CIFAR10, STL10, and AGNews (Zhang et al., 2015), as publicly available and mismatched query datasets  $\mathbf{D}^Q$ . To instantiate task accuracy, we compare accuracy of the extracted models  $f_{\text{MARICH}}^E$  with the target model and models extracted by Random Sampling (RS),  $f_{\text{RS}}^E$ . To instantiate informativeness of the extracted models (Nasr et al., 2019), we compare

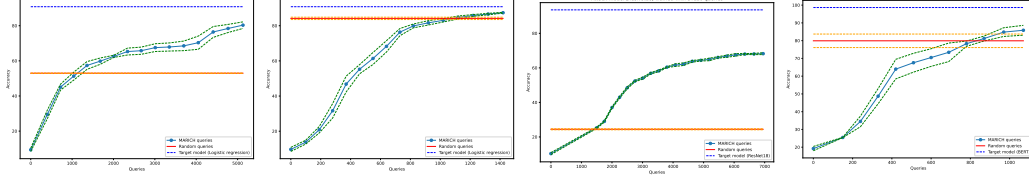

(a) Logistic regression with EMNIST queries (b) Logistic regression with CIFAR10 queries (c) ResNet18 with STL10 queries (d) BERT with AGNews queries

Figure 2: Accuracy of the extracted model (mean  $\pm$  std. over 10 runs) in comparison to the target model using MARICH and random sampling. Each figure stands for a target model class and a query dataset. Models extracted using queries selected by MARICH are closer to the target model.

the membership inference, i.e. membership inference accuracy, AUC of membership inference, and membership inference agreements, performed on the target models, and the models extracted using MARICH and RS with same query budget. For membership inference, we use in-built membership attack from IBM ART (Nicolae et al., 2018). The objectives of our experimental studies are:

1. How do the accuracy of the model extracted using MARICH on the private dataset compare with that of the target model, and RS with same query budget?
2. How do the models extracted by MARICH behave under membership inference attack in comparison to the target model, and the models extracted by RS with same query budget?

**Accuracy of Extracted Models.** MARICH extract logistic regression models with 5,130 (3.5%) and 1,420 (2.37%) queries from EMNIST and CIFAR10 query datasets by attacking a target logistic regression model,  $f_{logistic}^T$  trained on MNIST. While the target model achieves 90.82% test accuracy, the models extracted using EMNIST and CIFAR10 achieve test accuracies 80.32% (88.43% of  $f_{logistic}^T$ ) and 87.39% (96.22% of  $f_{logistic}^T$ ), respectively (Figure 2a and 2b). The models extracted using RS show test accuracy 52.96% and 84.18%, i.e. 58.31% and 92.69% of  $f_{logistic}^T$ , respectively.

MARICH attacks a ResNet18,  $f_{ResNet}^T$ , trained on CIFAR10 (accuracy: 93.58%) with 6,950 (6.15%) queries from STL10 dataset. The extracted ResNet18 shows 68.22% (72.90% of  $f_{ResNet}^T$ ) test accuracy. But the model extracted using RS achieves 24.44% (26.12% of  $f_{ResNet}^T$ ) accuracy (Fig. 2c).

To verify MARICH’s effectiveness for text data, we attack a BERT,  $f_{BERT}^T$  trained on BBCNews (test accuracy: 98.65%) with queries from the AGNews dataset. By using only 0.83% of AGNews, i.e. 1,070 queries, MARICH extracts a model with 87.01% (88.20% of  $f_{BERT}^T$ ) test accuracy (Figure 2d). The model extracted using RS shows test accuracy of 79.91% (81.00% of  $f_{BERT}^T$ ).

Thus, for all the models and datasets, MARICH is able to extract models that achieve closer test accuracy with respect to the target models and are more accurate than the models extracted by RS.

**Membership Inference with Extracted Models.** In Table 1, we report the statistics, i.e. *accuracy*, *agreement* in inference with target model, and *agreement AUC*, of membership attacks performed on different target models and extracted models with different query datasets. The models extracted using MARICH demonstrate higher MI agreement with the target models than the models extracted using RS (Figure 4). They also achieve comparable MI accuracy with respect to the target model. These results instantiate that the models extracted by MARICH act as informative replicas of the target model.

**Analysis of Membership Distributions.** To analyse the outcomes of MI attacks further, we visualise the membership distributions for a BERT model trained on BBCNews dataset, and two BERT models,  $f_{MARICH}^E$  and  $f_{random}^E$  extracted using MARICH and RS respectively. To check efficacy of MI, we use BBCNews as the member dataset and AGNews as the non-member dataset. After training 5 neural nets on them, we compute the distribution of membership probabilities for the member and non-member

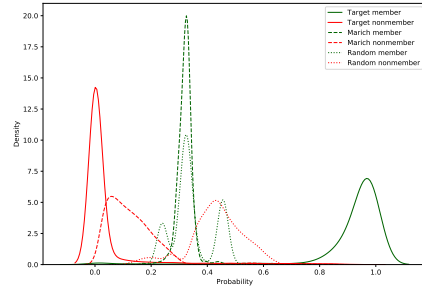

Figure 3: BERT with AGNews queries



Table 1: Statistics of membership inference (MI) for different target models, datasets &amp; attacks

| Member dataset | Target model | Query Dataset | Algorithm | Non-member dataset | #Queries      | MI acc.       | MI agreement  | MI agreement AUC |
|----------------|--------------|---------------|-----------|--------------------|---------------|---------------|---------------|------------------|
| MNIST          | LR           | -             | -         | EMNIST             | 50,000 (100%) | 87.99%        | -             | -                |
| MNIST          | LR           | -             | -         | CIFAR10            | 50,000 (100%) | 92.30%        | -             | -                |
| MNIST          | LR           | EMNIST        | MARICH    | EMNIST             | 5,130 (3.5%)  | 88.58%        | 92.82%        | <b>92.73%</b>    |
| MNIST          | LR           | CIFAR10       | MARICH    | CIFAR10            | 1,420 (2.37%) | <b>94.27%</b> | <b>93.97%</b> | 92.43%           |
| MNIST          | LR           | EMNIST        | RS        | EMNIST             | 5,130 (3.5%)  | 89.61%        | 91.01%        | 91.11%           |
| MNIST          | LR           | CIFAR10       | RS        | CIFAR10            | 1,420 (2.37%) | 92.61%        | 89.84%        | 85.79%           |
| CIFAR10        | Resnet18     | -             | -         | STL10              | 40,000 (100%) | 79.35%        | -             | -                |
| CIFAR10        | Resnet19     | STL10         | MARICH    | STL10              | 6,950 (6.15%) | <b>93.90%</b> | <b>75.52%</b> | <b>76.69%</b>    |
| CIFAR10        | Resnet19     | STL10         | RS        | STL10              | 6,950 (6.15%) | 92.32%        | 75.25%        | 75.83%           |
| BBCNews        | BERT         | -             | -         | AGNews             | 1,490 (100%)  | <b>98.61%</b> | -             | -                |
| BBCNews        | BERT         | AGNews        | MARICH    | AGNews             | 1,070 (0.83%) | 94.42%        | <b>91.02%</b> | <b>82.62%</b>    |
| BBCNews        | BERT         | AGNews        | RS        | AGNews             | 1,070 (0.83%) | 89.17%        | 86.93%        | 58.64%           |

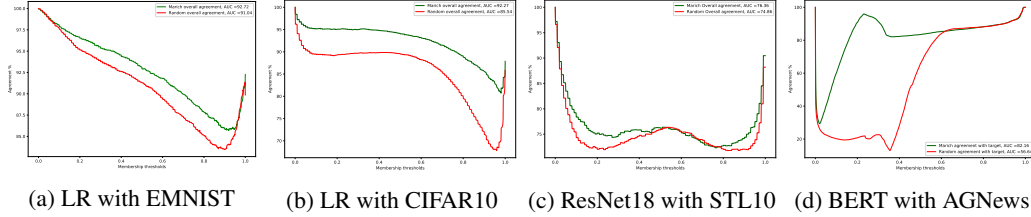

Figure 4: Membership agreements of models extracted by MARICH and by Random Sampling (mean over 10 runs). Each figure stands for a target model class and a query dataset. Models extracted using queries selected by MARICH are higher.

data points for  $f^T$ ,  $f_{\text{MARICH}}^E$  and  $f_{\text{random}}^E$ . From Figure 3, we observe that MI on  $f_{\text{MARICH}}^E$  produces membership distributions closer to the membership distributions of  $f^T$  than those of the  $f_{\text{random}}^E$ .

**Summary of Results.** From the experimental results, we deduce the following conclusions.

*Accuracy.* Test accuracy (on the subsets of private datasets) of the models extracted using MARICH are higher than the models extracted with random queries and ... of the target model (Figure 2 and Table 1). This shows effectiveness of MARICH as a task accuracy extraction attack, while solving distributional equivalence and max-info extractions.

*Effective Membership Inference.* The agreement in MI achieved by attacking  $f_{\text{MARICH}}^E$  and the target model is always higher than that of the  $f_{\text{RS}}^E$  (Figure 4). Also, membership accuracy for  $f_{\text{MARICH}}^E$ s are 88.58% – 94.42% (Table 1). This shows that the models extracted by MARICH act as informative replicas of the target model.

*Query-efficiency.* Table 1 shows that MARICH uses only (0.83 – 6.15%) of the public query datasets, which in most cases are lower than data used for training the target models. This shows MARICH is significantly query efficient whereas other known active learning attacks use at least 8% of the query dataset to begin (Pal et al., 2020, Table 2).

## 7 CONCLUSION AND FUTURE DIRECTIONS

In this paper, we investigate the design of a model extraction attack against a target ML model (specifically classifier) trained on a private dataset and accessible through a public API, which returns only a predicted label for a given query. We propose the notions of distributional equivalence extraction, which extends the existing notions task accuracy and functionally equivalent model extractions. We also propose another information-theoretic notion, i.e. Max-Info model extraction. We further propose a variational relaxation of these two types of extraction attacks. We solve this variational optimisation problem by proposing an online and adaptive query selection algorithm, MARICH, which uses a publicly available query dataset different than the private dataset. We experimentally demonstrate that the models extracted by MARICH achieve 68.22 – 87.39% accuracy on the private dataset while using 0.83 – 6.15% of the query dataset. For both text and image data, we demonstrate that the models extracted by MARICH act as informative replicas of the target models leading to 79.35 – 94.42% accuracy and 75.52 – 93.97% agreement in membership inference on the target model.

Typically, the functional equivalence attacks require model-specific techniques, while our experiments validate that MARICH can be model-oblivious while performing distributional equivalence attack. This poses an interesting question: is distributional equivalence extraction ‘easier’ than functional equivalence extraction, which is NP-hard (Jagielski et al., 2020)?

## REFERENCES

- Lejla Batina, Shivam Bhasin, Dirmanto Jap, and Stjepan Picek. CSI neural network: Using side-channels to recover your artificial neural network information. *CoRR*, abs/1810.09076, 2018.
- Varun Chandrasekaran, Kamalika Chaudhuri, Irene Giacomelli, Somesh Jha, and Songbai Yan. Exploring connections between active learning and model extraction. In *29th USENIX Security Symposium (USENIX Security 20)*, pp. 1309–1326, 2020.
- Gregory Cohen, Saeed Afshar, Jonathan Tapson, and André van Schaik. Emnist: Extending mnist to handwritten letters. In *2017 International Joint Conference on Neural Networks (IJCNN)*, pp. 2921–2926, 2017. doi: 10.1109/IJCNN.2017.7966217.
- Jacson Rodrigues Correia-Silva, Rodrigo F Berriel, Claudine Badue, Alberto F de Souza, and Thiago Oliveira-Santos. Copycat cnn: Stealing knowledge by persuading confession with random non-labeled data. In *2018 International Joint Conference on Neural Networks (IJCNN)*, pp. 1–8. IEEE, 2018.
- Li Deng. The mnist database of handwritten digit images for machine learning research. *IEEE Signal Processing Magazine*, 29(6):141–142, 2012.
- Jacob Devlin, Ming-Wei Chang, Kenton Lee, and Kristina Toutanova. Bert: Pre-training of deep bidirectional transformers for language understanding. *arXiv preprint arXiv:1810.04805*, 2018.
- Ian Goodfellow, Yoshua Bengio, Aaron Courville, and Yoshua Bengio. *Deep learning*, volume 1. MIT Press, 2016.
- Kaiming He, Xiangyu Zhang, Shaoqing Ren, and Jian Sun. Deep residual learning for image recognition. In *Proceedings of the IEEE conference on computer vision and pattern recognition*, pp. 770–778, 2016.
- Matthew Jagielski, Nicholas Carlini, David Berthelot, Alex Kurakin, and Nicolas Papernot. High accuracy and high fidelity extraction of neural networks. In *29th USENIX security symposium (USENIX Security 20)*, pp. 1345–1362, 2020.
- Mika Juuti, Sebastian Szyller, Samuel Marchal, and N Asokan. Prada: protecting against dnn model stealing attacks. In *2019 IEEE European Symposium on Security and Privacy (EuroS&P)*, pp. 512–527. IEEE, 2019.
- Alex Krizhevsky, Vinod Nair, and Geoffrey Hinton. Cifar-10 (canadian institute for advanced research). URL <http://www.cs.toronto.edu/~kriz/cifar.html>.
- Daniel Lowd and Christopher Meek. Good word attacks on statistical spam filters. In *CEAS*, volume 2005, 2005.
- Smitha Milli, Ludwig Schmidt, Anca D Dragan, and Moritz Hardt. Model reconstruction from model explanations. In *Proceedings of the Conference on Fairness, Accountability, and Transparency*, pp. 1–9, 2019.
- Takayuki Miura, Satoshi Hasegawa, and Toshiki Shibahara. Megex: Data-free model extraction attack against gradient-based explainable ai. *arXiv preprint arXiv:2107.08909*, 2021.
- Milad Nasr, Reza Shokri, and Amir Houmansadr. Comprehensive privacy analysis of deep learning: Passive and active white-box inference attacks against centralized and federated learning. In *2019 IEEE symposium on security and privacy (SP)*, pp. 739–753. IEEE, 2019.
- Maria-Irina Nicolae, Mathieu Sinn, Minh Ngoc Tran, Beat Buesser, Amrith Rawat, Martin Wistuba, Valentina Zantedeschi, Nathalie Baracaldo, Bryant Chen, Heiko Ludwig, Ian Molloy, and Ben Edwards. Adversarial robustness toolbox v1.2.0. *CoRR*, 1807.01069, 2018. URL <https://arxiv.org/pdf/1807.01069>.
- Tribhuvanesh Orekondy, Bernt Schiele, and Mario Fritz. Knockoff nets: Stealing functionality of black-box models. In *Proceedings of the IEEE/CVF conference on computer vision and pattern recognition*, pp. 4954–4963, 2019.

- Soham Pal, Yash Gupta, Aditya Shukla, Aditya Kanade, Shirish Shevade, and Vinod Ganapathy. Activethief: Model extraction using active learning and unannotated public data. In *Proceedings of the AAAI Conference on Artificial Intelligence*, volume 34, pp. 865–872, 2020.
- Soham Pal, Yash Gupta, Aditya Kanade, and Shirish Shevade. Stateful detection of model extraction attacks. *arXiv preprint arXiv:2107.05166*, 2021.
- Nicolas Papernot, Patrick McDaniel, Ian Goodfellow, Somesh Jha, Z Berkay Celik, and Ananthram Swami. Practical black-box attacks against machine learning. In *Proceedings of the 2017 ACM on Asia conference on computer and communications security*, pp. 506–519, 2017.
- Mauro Ribeiro, Katarina Grolinger, and Miriam AM Capretz. Mlaas: Machine learning as a service. In *2015 IEEE 14th International Conference on Machine Learning and Applications (ICMLA)*, pp. 896–902. IEEE, 2015.
- Reza Shokri, Marco Stronati, Congzheng Song, and Vitaly Shmatikov. Membership inference attacks against machine learning models. In *2017 IEEE symposium on security and privacy (SP)*, pp. 3–18. IEEE, 2017.
- Congzheng Song and Vitaly Shmatikov. Overlearning reveals sensitive attributes. In *8th International Conference on Learning Representations, ICLR 2020*, 2020.
- Joe Staines and David Barber. Variational optimization. *arXiv preprint arXiv:1212.4507*, 2012.
- Florian Tramèr, Fan Zhang, Ari Juels, Michael K Reiter, and Thomas Ristenpart. Stealing machine learning models via prediction {APIs}. In *25th USENIX security symposium (USENIX Security 16)*, pp. 601–618, 2016.
- Zhilin Yang, Zihang Dai, Yiming Yang, Jaime Carbonell, Russ R Salakhutdinov, and Quoc V Le. Xlnet: Generalized autoregressive pretraining for language understanding. *Advances in neural information processing systems*, 32, 2019.
- Samuel Yeom, Irene Giacomelli, Matt Fredrikson, and Somesh Jha. Privacy risk in machine learning: Analyzing the connection to overfitting. In *2018 IEEE 31st computer security foundations symposium (CSF)*, pp. 268–282. IEEE, 2018.
- Xiang Zhang, Junbo Jake Zhao, and Yann LeCun. Character-level convolutional networks for text classification. In *NIPS*, 2015.

## A PROOFS OF SECTION 4

In this section, we elaborate the proofs for the Theorems 1 and 2.<sup>2</sup>

**Theorem 1** (Upper Bounding Distributional Closeness). *If we choose KL-divergence as the divergence function  $D$ , we can show that*

$$D_{\text{KL}}(\Pr(f_{\theta^*}^T(Q), Q) \| \Pr(f_{\omega_{\text{Deq}}^E}^E(Q), Q)) \leq \min_{\omega} \mathbb{E}_Q[l(f_{\theta^*}^T(Q), f_{\omega}^E(Q))] - H(f_{\omega}^E(Q)).$$

*Proof.* Let us consider a query generating distribution  $\mathcal{D}^Q$  on  $\mathbb{R}^d$ . A target model  $f_{\theta^*}^T : \mathbb{R}^d \rightarrow \mathcal{Y}$  induces a joint distribution over the query and the output (or label) space, denoted by  $\Pr(f_{\theta^*}^T, Q)$ . Similarly, the extracted model  $f_{\omega}^E : \mathbb{R}^d \rightarrow \mathcal{Y}$  also induces a joint distribution over the query and the output (or label) space, denoted by  $\Pr(f_{\omega}^E, Q)$ .

$$\begin{aligned} & D_{\text{KL}}(\Pr(f_{\theta^*}^T(Q), Q) \| \Pr(f_{\omega}^E(Q), Q)) \\ &= \int_{Q \in \mathbb{R}^d} d\Pr(f_{\theta^*}^T(Q), Q) \log \frac{\Pr(f_{\theta^*}^T(Q), Q)}{\Pr(f_{\omega}^E(Q), Q)} \\ &= \int_{Q \in \mathbb{R}^d} \Pr(f_{\theta^*}^T(Q)|Q=q) \Pr(Q=q) \log \frac{\Pr(f_{\theta^*}^T(Q)|Q=q)}{\Pr(f_{\omega}^E(Q)|Q=q)} dq \\ &= \int_{Q \in \mathbb{R}^d} \Pr(f_{\theta^*}^T(Q)|Q=q) \Pr(Q=q) \log \Pr(f_{\theta^*}^T(Q)|Q=q) dq \\ &\quad - \int_{Q \in \mathbb{R}^d} \Pr(f_{\theta^*}^T(Q)|Q=q) \Pr(Q=q) \log \Pr(f_{\omega}^E(Q)|Q=q) dq \\ &= \int_{Q \in \mathbb{R}^d} \Pr(f_{\theta^*}^T(Q)|Q=q) \Pr(Q=q) \log \Pr(f_{\theta^*}^T(Q)|Q=q) dq + \mathbb{E}_{q \sim \mathcal{D}^Q} [l(f_{\theta^*}^T(q), f_{\omega}^E(q))] \\ &\leq -H(f_{\theta^*}^T(Q)) + \mathbb{E}_{q \sim \mathcal{D}^Q} [l(f_{\theta^*}^T(q), f_{\omega}^E(q))] \\ &\leq -H(f_{\omega}^E(Q)) + \mathbb{E}_{q \sim \mathcal{D}^Q} [l(f_{\theta^*}^T(q), f_{\omega}^E(q))] \end{aligned} \tag{8}$$

The last inequality holds true as the extracted model  $f_{\omega}^E$  is trained using the outputs of the target model  $f_{\theta^*}^T$ . Thus, by data-processing inequality, its output distribution possesses less information than that of the target model. Specifically, we know that if  $Y = f(X)$ ,  $H(Y) \leq H(X)$ .

Now, by taking  $\min_{\omega}$  on both sides, we obtain

$$D_{\text{KL}}(\Pr(f_{\theta^*}^T(Q), Q) \| \Pr(f_{\omega_{\text{Deq}}^E}^E(Q), Q)) \leq \min_{\omega} \mathbb{E}_Q[l(f_{\theta^*}^T(Q), f_{\omega}^E(Q))] - H(f_{\omega}^E(Q)).$$

Here,  $\omega_{\text{Deq}}^* \triangleq \arg \min_{\omega} D_{\text{KL}}(\Pr(f_{\theta^*}^T(Q), Q) \| \Pr(f_{\omega}^E(Q), Q))$ . The equality exists if minima of LHS and RHS coincide.  $\square$

**Theorem 2** (Lower Bounding Information Leakage). *The information leaked by any max-information attack (Equation 3) is lower bounded as follows:*

$$I(\Pr(f_{\theta^*}^T(Q), Q) \| \Pr(f_{\omega_{\text{MaxInf}}^E}^E(Q), Q)) \geq \max_{\omega} -\mathbb{E}_Q[l(f_{\theta^*}^T(Q), f_{\omega}^E(Q))] + H(f_{\omega}^E(Q)).$$

*Proof.* Let us consider the same terminology as the previous proof. Then,

$$\begin{aligned} & I(\Pr(f_{\theta^*}^T(Q), Q) \| \Pr(f_{\omega}^E(Q), Q)) \\ &= H(f_{\theta^*}^T(Q), Q) + H(f_{\omega}^E(Q), Q) - H(f_{\theta^*}^T(Q), f_{\omega}^E(Q), Q) \\ &= H(f_{\theta^*}^T(Q), Q) + H(f_{\omega}^E(Q), Q) - H(f_{\omega}^E(Q), Q | f_{\theta^*}^T(Q)) + H(f_{\theta^*}^T(Q)) \\ &\geq H(f_{\omega}^E(Q), Q) - H(f_{\omega}^E(Q), Q | f_{\theta^*}^T(Q)) \end{aligned} \tag{9}$$

$$\geq H(f_{\omega}^E(Q)) - H(f_{\omega}^E(Q), Q | f_{\theta^*}^T(Q)) \tag{10}$$

$$\geq H(f_{\omega}^E(Q)) - \mathbb{E}_Q[l(f_{\omega}^E(Q), f_{\theta^*}^T(Q))] \tag{11}$$

<sup>2</sup>Throughout the proofs, we slightly abuse the notation to write  $l(\Pr(X), \Pr(Y))$  as  $l(X, Y)$  for avoiding cumbersome equations.

The inequality of Equation 9 is due to the fact that entropy is always non-negative. Equation 10 holds true as  $H(X, Y) \geq \max\{H(X), H(Y)\}$  for two random variables  $X$  and  $Y$ . The last inequality is due to the fact that conditional entropy of two random variables  $X$  and  $Y$ , i.e.  $H(X|Y)$ , is smaller than or equal to their cross entropy, i.e.  $l(X, Y)$  (Lemma 1).

Now, by taking  $\max_{\omega}$  on both sides, we obtain

$$I(\Pr(f_{\theta^*}^T(Q), Q) \| \Pr(f_{\omega_{\text{MaxInf}}^E}^E(Q), Q)) \leq \max_{\omega} -\mathbb{E}_Q[l(f_{\theta^*}^T(Q), f_{\omega}^E(Q))] + H(f_{\omega}^E(Q)).$$

Here,  $\omega_{\text{MaxInf}}^* \triangleq \arg \max_{\omega} I(\Pr(f_{\theta^*}^T(Q), Q) \| \Pr(f_{\omega_{\text{MaxInf}}^E}^E(Q), Q))$ . The equality exists if maxima of LHS and RHS coincide.  $\square$

**Lemma 1** (Relating Cross Entropy and Conditional Entropy). *Given two random variables  $X$  and  $Y$ , conditional entropy*

$$H(X|Y) \leq l(X, Y). \quad (12)$$

*Proof.* Here,  $H(X|Y) \triangleq -\int \Pr(x, y) \log \frac{\Pr(x, y)}{\Pr(y)}$  and  $l(X, Y) \triangleq l(\Pr(X), \Pr(Y)) = -\int \Pr(x) \ln \Pr(y)$  denotes the cross-entropy.

$$\begin{aligned} l(X, Y) &= H(X) + D_{\text{KL}}(\Pr(X) \| \Pr(Y)) \\ &= H(X|Y) + I(X; Y) + D_{\text{KL}}(P_X \| P_Y) \\ &\geq H(X|Y) \end{aligned}$$

The last inequality holds as both mutual information  $I$  and KL-divergence  $D_{\text{KL}}$  are non-negative functions for any  $X$  and  $Y$ .  $\square$

## B ADDITIONAL EXPERIMENTAL RESULTS

We provide an anonymised version of the code at: [https://drive.google.com/drive/folders/1mpM-zE3w\\_pIS0c3DDb\\_uir9Jw\\_MYvVer?usp=sharing](https://drive.google.com/drive/folders/1mpM-zE3w_pIS0c3DDb_uir9Jw_MYvVer?usp=sharing).

Here, we elaborate further experimental setups against CNN models and also finer details of extraction results (Table 2, Figure 5, and Figure 6).

**Extraction of a CNN Trained on MNIST.** Along with the other experiments mentioned in the paper, we trained a CNN with MNIST handwritten digits ( $\mathbf{D}^T$  here), that shows a test accuracy of 97.53% on a disjoint test set. Two datasets are used as  $\mathbf{D}^Q$  here, EMNIST letters and CIFAR10 to extract two CNN models from the target model. MARICH extracts two CNNs using queries from EMNIST letters and CIFAR10 which show test accuracies of 88.81% and 87.16% respectively. On the other hand, models extracted using random sampling using EMNIST letters and CIFAR10 show accuracies of 85.37% and 88.46% respectively. Table 2 contains queries used, and membership inference statistics for all the experiments.

**Summary of Observations.** From Figure 5, we see that in most cases the probability densities of the membership inference are closer to the target model when the model is extracted using MARICH, than using random sampling (RS).

In Figure 6, we present the agreements from the member points, nonmember points and overall agreement curves for varying membership thresholds, along with the AUCs of the overall membership agreements. We see that in most cases, the agreement curves for the models extracted using MARICH are above those for the models extracted using random sampling, thus AUCs are higher for the models extracted using MARICH.

These observations support our claim that model extraction using MARICH gives models are accurate and informative replica of the target model.

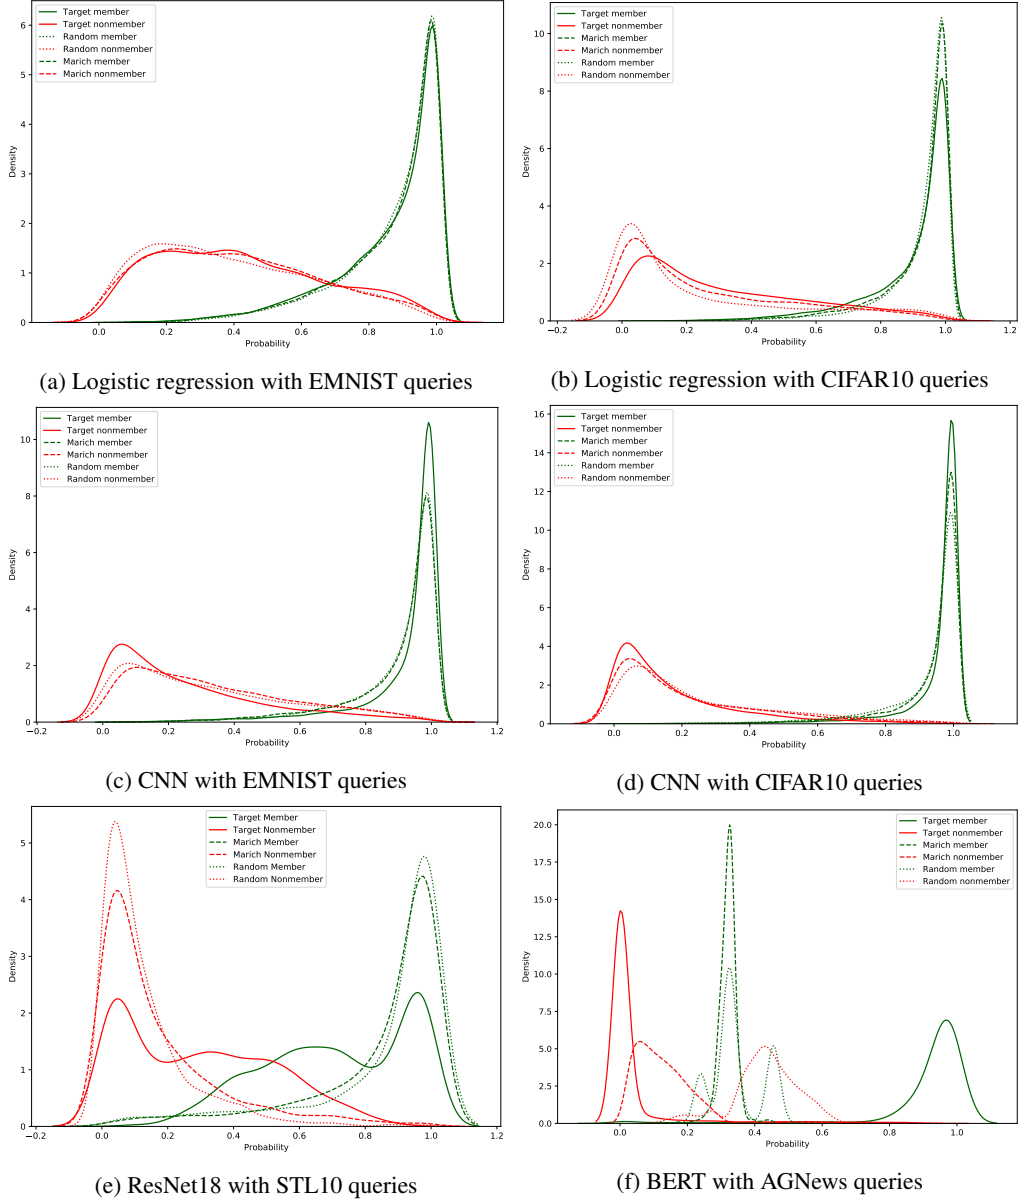

Figure 5: Comparison among membership vs. non-membership probability densities for membership attacks against models extracted by MARICH, Random sampling and the target model. Each figure represents the model class and query dataset. Memberships and non-memberships inferred from the model extracted by MARICH are significantly closer to the target model.

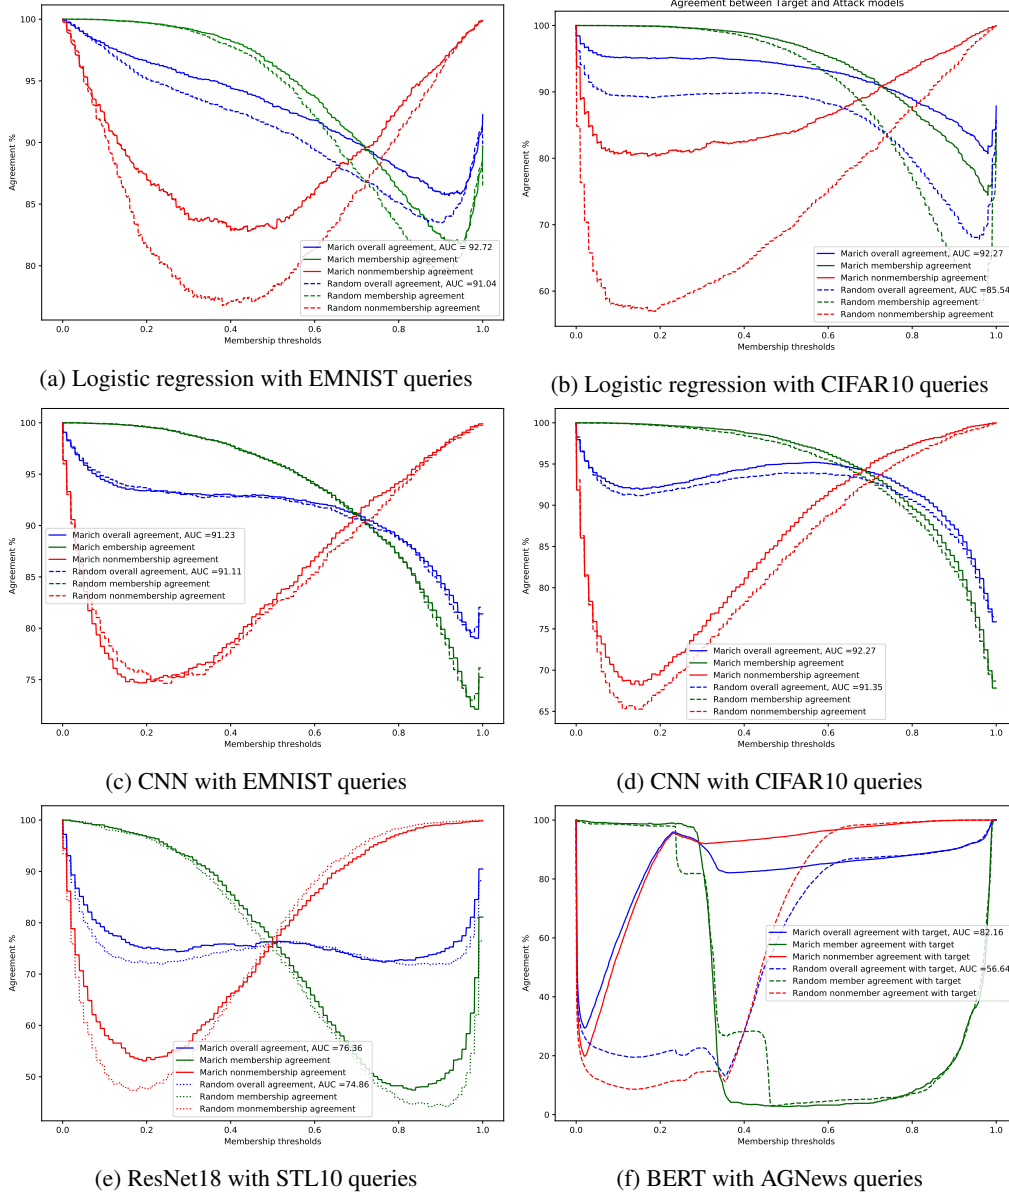

Figure 6: Comparison of membership, nonmembership and overall agreements of membership attacks against models extracted by MARICH and Random sampling and the target model trained with MNIST. Each figure represents the model class and query dataset. Membership agreement of the models extracted by MARICH are higher.

Table 2: Model extraction and membership inference statistics

| Member dataset | Target model | Attack Dataset | Algorithm used  | Non-member dataset | Queries       | Membership acc | Nonmembership acc | Overall membership acc | Overall Membership agreement | Membership agreement AUC |
|----------------|--------------|----------------|-----------------|--------------------|---------------|----------------|-------------------|------------------------|------------------------------|--------------------------|
| MNIST          | LR           | -              | -               | EMNIST             | 50,000 (100%) | 94.91%         | 67.24%            | 87.99%                 | -                            | -                        |
| MNIST          | LR           | -              | -               | CIFAR10            | 50,000 (100%) | 97.13%         | 77.80%            | 92.30%                 | -                            | -                        |
| MNIST          | LR           | EMNIST         | MARICH          | EMNIST             | 5,130 (3.5%)  | 95.16%         | 68.84%            | 88.58%                 | 92.82%                       | 92.72%                   |
| MNIST          | LR           | CIFAR10        | MARICH          | CIFAR10            | 1,420 (2.37%) | 97.98%         | 83.16%            | 94.27%                 | 93.97%                       | 92.27%                   |
| MNIST          | LR           | EMNIST         | Random Sampling | EMNIST             | 5,130 (3.5%)  | 95.57%         | 71.72%            | 89.61%                 | 91.01%                       | 91.04%                   |
| MNIST          | LR           | CIFAR10        | Random Sampling | CIFAR10            | 1,420 (2.37%) | 95.15%         | 84.98%            | 92.61%                 | 89.84%                       | 85.54%                   |
| MNIST          | CNN          | -              | -               | EMNIST             | 50,000 (100%) | 91.85%         | 74.84%            | 87.57%                 | -                            | -                        |
| MNIST          | CNN          | -              | -               | CIFAR10            | 50,000 (100%) | 94.94%         | 83.05%            | 91.97%                 | -                            | -                        |
| MNIST          | CNN          | EMNIST         | MARICH          | EMNIST             | 5,440 (3.73%) | 95.07%         | 80.32%            | 91.38%                 | 92.64%                       | 91.23%                   |
| MNIST          | CNN          | CIFAR10        | MARICH          | CIFAR10            | 5545 (9.24%)  | 93.48%         | 78.66%            | 89.78%                 | 94.92%                       | 92.27%                   |
| MNIST          | CNN          | EMNIST         | Random Sampling | EMNIST             | 5,440 (3.73%) | 95.95%         | 79.50%            | 91.84%                 | 92.35%                       | 91.11%                   |
| MNIST          | CNN          | CIFAR10        | Random Sampling | CIFAR10            | 5545 (9.24%)  | 97.59%         | 85.90%            | 94.66%                 | 94.16%                       | 91.35%                   |
| CIFAR10        | Resnet18     | -              | -               | STL10              | 40,000 (100%) | 81.55%         | 77.15%            | 79.35%                 | -                            | -                        |
| CIFAR10        | Resnet19     | STL10          | MARICH          | STL10              | 6,950 (6.15%) | 92.80%         | 91.75%            | 92.32%                 | 75.52%                       | 76.36%                   |
| CIFAR10        | Resnet19     | STL10          | Random Sampling | STL10              | 6,950 (6.15%) | 92.75%         | 95.05%            | 93.90%                 | 75.25%                       | 74.86%                   |
| BBCNews        | BERT         | -              | -               | AGNews             | 1,490 (100%)  | 91.69%         | 99.56%            | 98.61%                 | -                            | -                        |
| BBCNews        | BERT         | AGNews         | MARICH          | AGNews             | 1,070 (0.83%) | 80.96%         | 96.25%            | 94.42%                 | 91.02%                       | 82.16%                   |
| BBCNews        | BERT         | AGNews         | Random Sampling | AGNews             | 1,070 (0.83%) | 23.01%         | 98.28%            | 89.17%                 | 86.93%                       | 58.64%                   |
